# Supplementary material for: Impact of Daily Electronic Laboratory Alerting on Early Detection and Clinical Documentation of Acute Kidney Injury in Hospital Settings
Source: PubMed Central journal article supplement — Acad Pathol. 2018 Dec 4;5:2374289518816502. doi: 10.1177/2374289518816502 (PMC6287301; doi:10.1177/2374289518816502), 2018-12-04

## Supplemental Figure Legends

### **Supplemental Figure 1: Timeline of implementation of Laboratory AKI Algorithm**

This figure shows the monthly incidence rates based on clinical documentation of AKI at the pilot hospital site began to steadily increase from July 2014 to December 2014 concurrent with the ongoing educational campaign. CDI: Clinical Documentation Improvement; AKI: Acute Kidney Injury; ATN: Acute Tubular Necrosis.

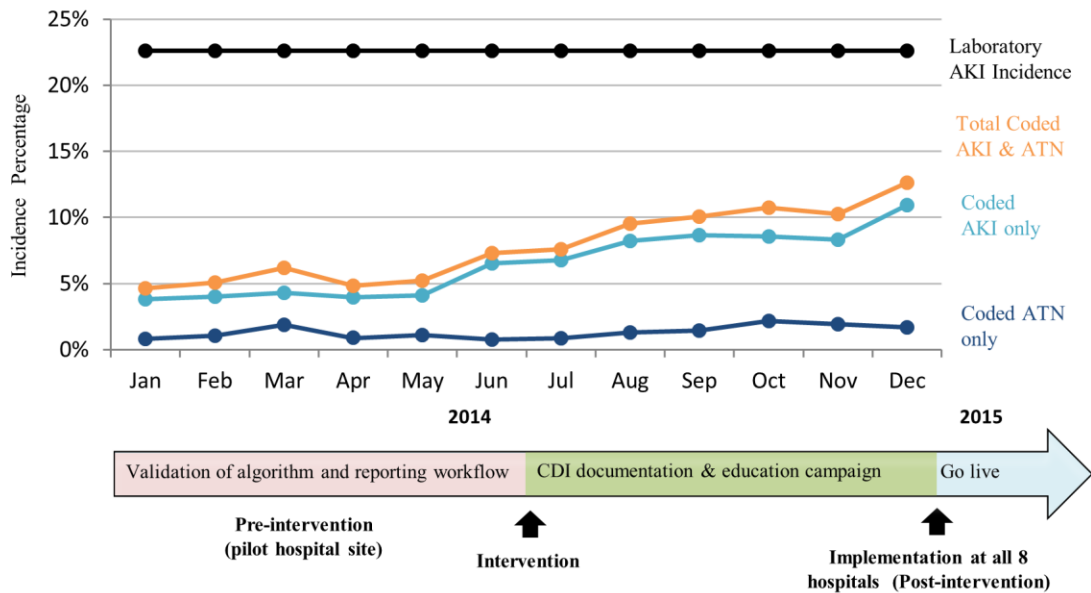

**Supplemental Figure 2: Comparison of Incidence Estimates, Laboratory and Administrative (Coded ICD) data before and after intervention**

This figure provides direct comparisons of incidence estimates between laboratory-identified AKI episodes versus administratively-documented AKI and ATN episodes for the 2014, 2015, 2016 and 2017 study period. Black bar: Laboratory data; Gray bar: Administrative ICD data; ICD: International Classification of Diseases; AKI: Acute Kidney Injury.

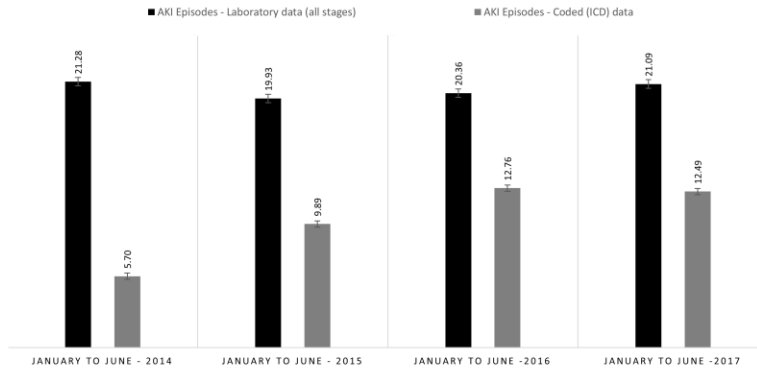

Supplement: APC-18-0034_FINAL_Supplemental_Figures.pdf [file APC-18-0034_FINAL_Supplemental_Figures.pdf]
